# Supplementary material
Source: PubMed Central journal article supplement (PMC4386991)

# Supplementary Figure S1

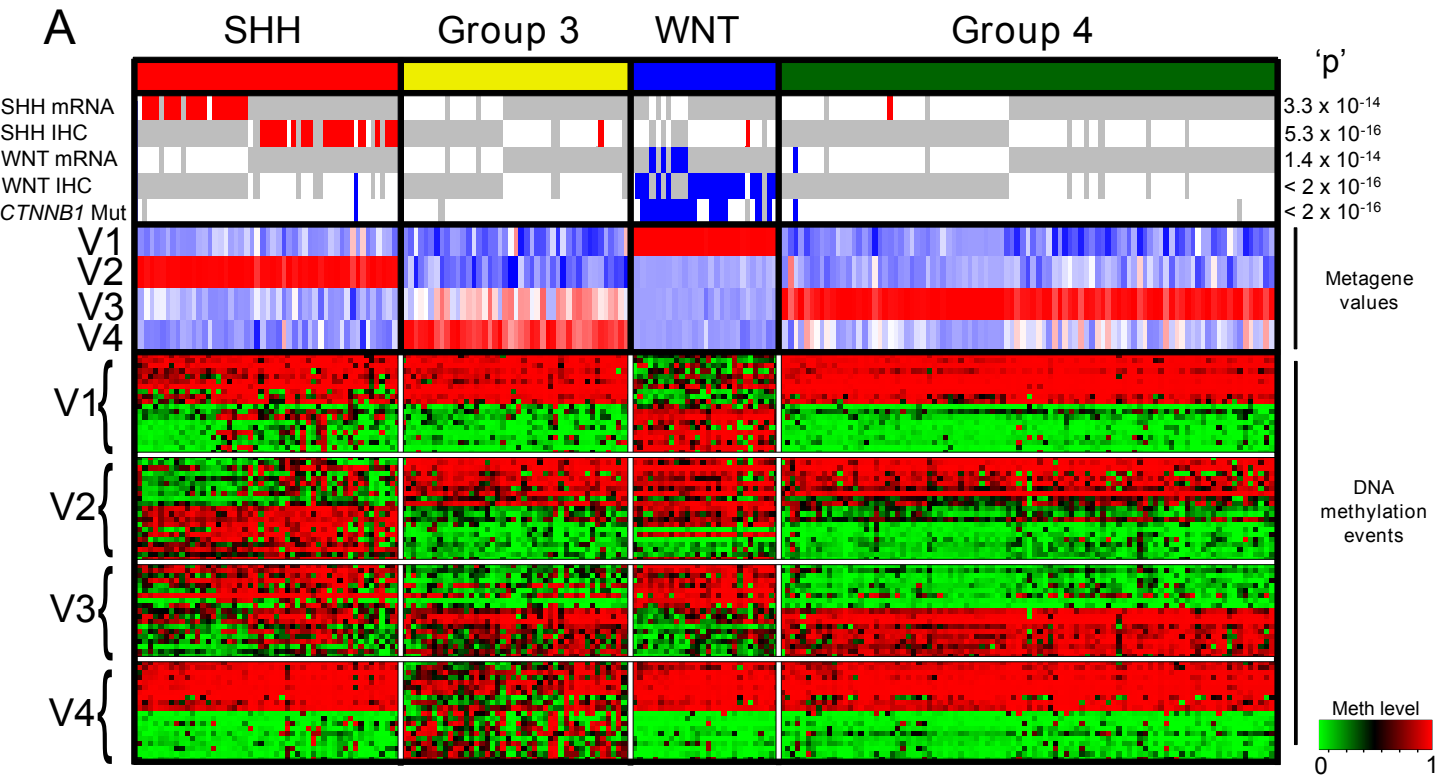

**B**

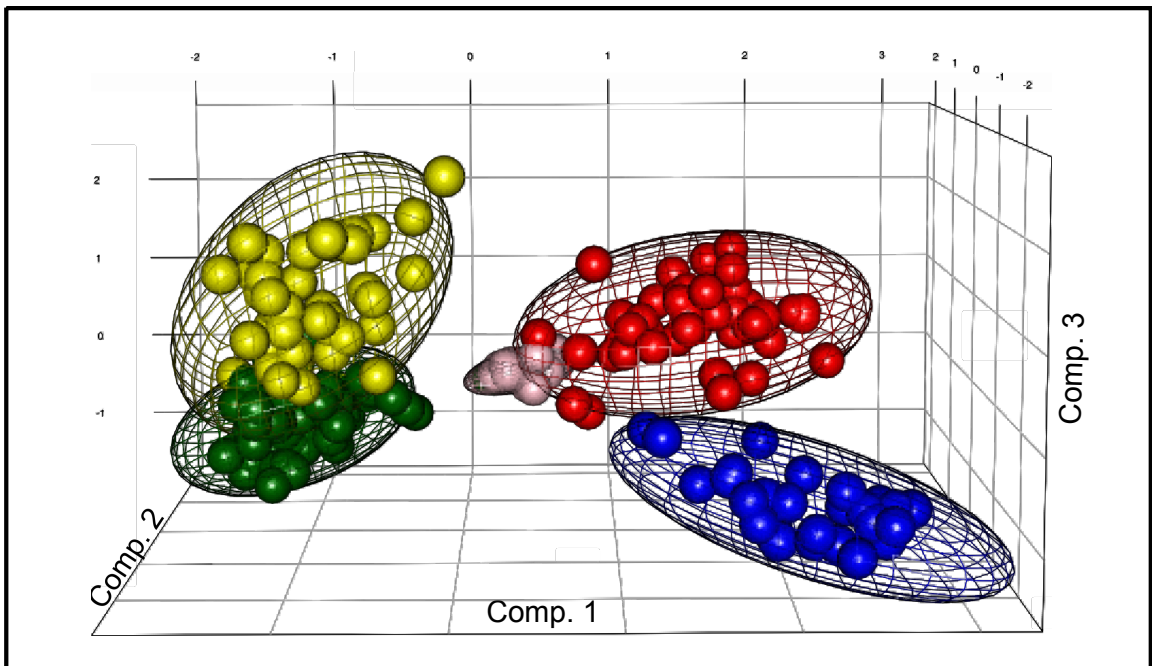

Supplement: NIHMS60889-supplement-3.pdf [file NIHMS60889-supplement-3.pdf]

# Supplementary Figure S3

**A**

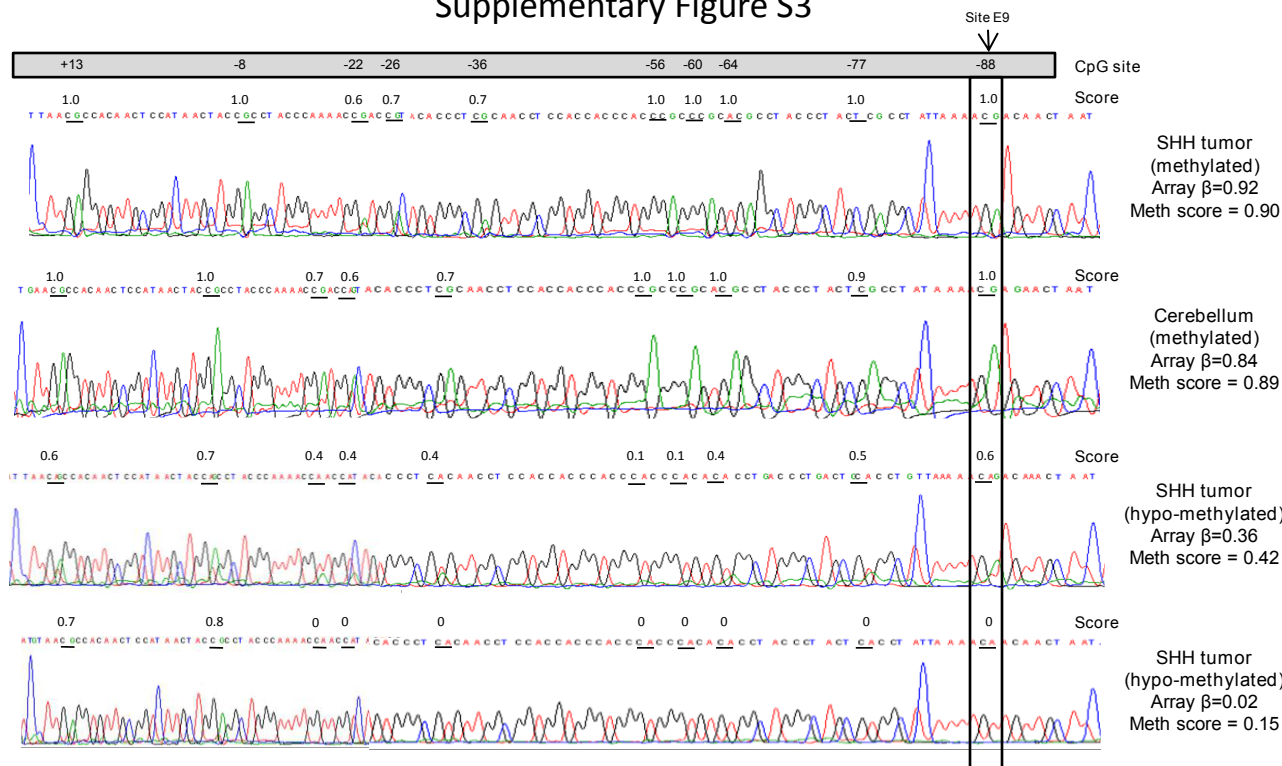

**B**

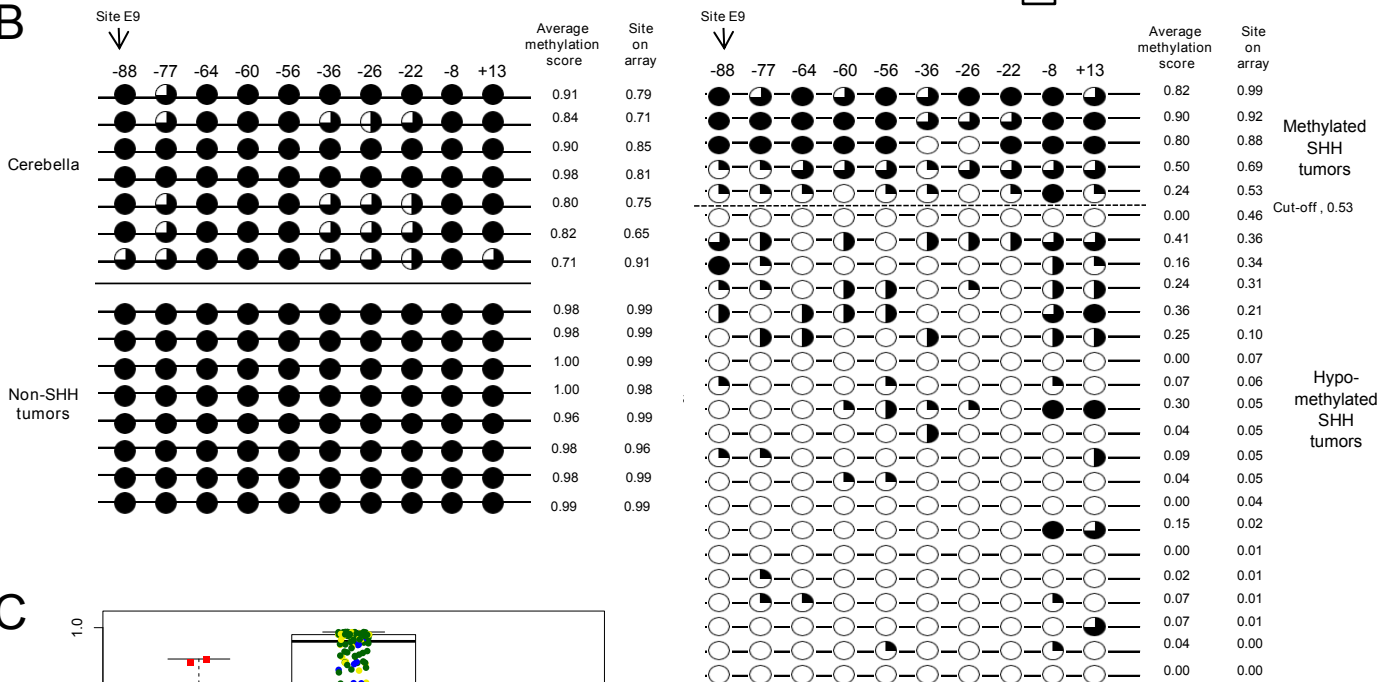

**C**

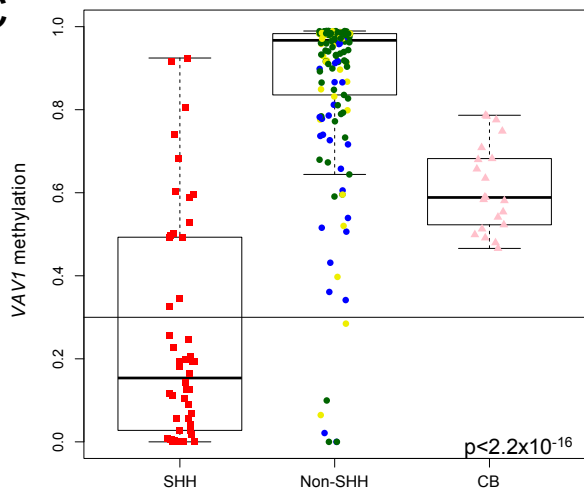

Supplement: NIHMS60889-supplement-5.pdf [file NIHMS60889-supplement-5.pdf]
